# Supplementary material for: Information exchange, responsibilities and expectation management in interhospital transfers: a qualitative study of hospital medicine physicians and advanced practice providers
Source: PubMed Central journal article supplement — BMJ Open Qual. 2024 Sep 25;13(3):e002768. doi: 10.1136/bmjoq-2024-002768 (PMC11426012; doi:10.1136/bmjoq-2024-002768), 2024-09-25
Supplement: bmjoq-13-3-s002.pdf [file bmjoq-13-3-s002.pdf]

## Appendix 2. AHRQ Care Coordination Measurement Framework and Domains

**Table 1. Mechanisms for Achieving Care Coordination (Domains)**

|                                                                                                                                                                                                                                                                                                                              |
|------------------------------------------------------------------------------------------------------------------------------------------------------------------------------------------------------------------------------------------------------------------------------------------------------------------------------|
| <b>Coordination Activities</b>                                                                                                                                                                                                                                                                                               |
| Establish Accountability or Negotiate Responsibility<br>Communicate<br>Facilitate Transitions<br>Assess Needs and Goals<br>Create a Proactive Plan of Care<br>Monitor, Follow Up, and Respond to Change<br>Support Self-Management Goals<br>Link to Community Resources<br>Align Resources with Patient and Population Needs |
| <b>Broad Approaches</b>                                                                                                                                                                                                                                                                                                      |
| Teamwork Focused on Coordination<br>Health Care Home<br>Care Management<br>Medication Management<br>Health IT-Enabled Coordination                                                                                                                                                                                           |

*Care Coordination Measures Atlas Update: Chapter 3. Care Coordination Measurement Framework, <https://www.ahrq.gov/ncepcr/care/coordination/atlas/chapter3.html> June 2014.*
